# Supplementary material
Source: publisher figshare collection journal article supplement (https://acs.figshare.com/ndownloader/files/4068298)
Supplement: Supplementary file 1 [file 4068298]

# **An Highly Enantioselective Synthesis of Multifunctionalized Dihydrofurans by Copper-Catalyzed Asymmetric [4+1] Cycloadditions of $\alpha$ -Benzylidene- $\beta$ -Ketoester with Diazo Compound**

## **Supporting Information**

Jiao-Long Zhou, Li-Jia Wang, Hao Xu, Xiu-Li Sun, Yong Tang\*  
*State Key Laboratory of Organometallic Chemistry, Shanghai Institute of Organic Chemistry,  
Chinese Academy of Sciences, 345 Lingling Lu, Shanghai 200032, China.*  
E-mail: [tangy@mail.sioc.ac.cn](mailto:tangy@mail.sioc.ac.cn)

## **Contents**

1. General information
2. General Procedure for the Synthesis of Chiral Sidearm Oxazolines
3. General procedure for the Synthesis of Chiral 2, 3-dihydrofuran
4. X-ray Data of **3g**
5.  $^1\text{H}$  and  $^{13}\text{C}$  NMR spectra
6. HPLC spectra

## 1. General information

All reactions were carried out under dry nitrogen atmosphere. Dichloromethane (DCM) was distilled over calcium hydride prior to use.  $\text{CuPF}_6(\text{CH}_3\text{CN})_4$ ,  $\text{CuCl}$ , and  $\text{AgSbF}_6$  were purchased from Aldrich, and the diazo esters,<sup>[1]</sup> substrate,<sup>[2]</sup> and ligand<sup>[3]</sup> were prepared according to literature procedures. Powdered M.S.  $4\text{\AA}$  was preactivated for 8 hours at  $250\text{ }^\circ\text{C}$  under vacuum prior to use.

NMR spectra were recorded on a Varian Mercury-300 or a Varian Mercury-400 nuclear magnetic resonance spectrometer. Chemical shifts are reported in parts per million (ppm) down field from TMS, using residual  $\text{CDCl}_3$  as an internal standard.

## 2. General Procedure for the Synthesis of Chiral Sidearm Oxazolines.

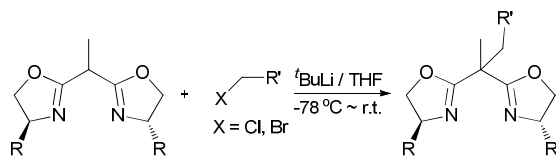

To a solution of bisoxazoline (2 mmol) in dried THF (30 mL) was added dropwise *t*-BuLi (1.3 mL, 1.7 M in hexanes, 2.2 mmol) within 15-20 min at  $-78\text{ }^\circ\text{C}$ . The resulting yellow solution was stirred for an additional 1 h at this temperature. Then a solution of halide (2.8 mmol) in THF (10 mL) was added dropwise at  $-78\text{ }^\circ\text{C}$  over 10 min. The solution was slowly warmed to room temperature and was stirred for a further 10 h. The mixture was filtered through a thin layer (40 mm) of silica gel (100-200 mesh). Then concentrated and the residue was purified by flash chromatography that filled with silica gel (400 mesh), and PE (petroleum ether) /Actone 3/1 as eluent.

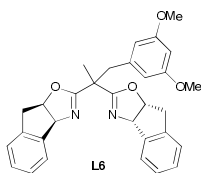

**(3aS,3a'S,8aR,8a'R)-2,2'-(1-(3,5-dimethoxyphenyl)propane-2,2-diyl)bis(8,8a-dihydro-3aH-indeno[1,2-d]oxazole)**

Yield: 45%. bp:  $119\text{--}121\text{ }^\circ\text{C}$ .  $[\alpha]_{\text{D}}^{20} = -302.6\text{ }^\circ$  ( $c = 1.00$ ,  $\text{CHCl}_3$ ).  $^1\text{H}$  NMR (400 MHz,  $\text{CDCl}_3$ ):  $\delta$  7.50-7.47 (m, 2H), 7.30-7.22 (m, 6H), 6.22 (t,  $J = 2.4\text{ Hz}$ , 1H), 6.18 (d,  $J = 2.4\text{ Hz}$ , 2H), 5.53 (d,  $J$

= 8.0 Hz, 1H), 5.49 (d,  $J$  = 8.0 Hz, 1H), 5.30-5.21 (m, 2H), 3.60 (s, 6H), 3.34-3.24 (m, 3H), 3.07 (d,  $J$  = 13.6 Hz, 1H), 2.88 (ABd,  $J$  = 6.8 Hz,  $J$  = 12.4 Hz, 2H), 1.34 (s, 3H);  $^{13}\text{C}$  NMR (100 MHz,  $\text{CDCl}_3$ ): 168.1, 167.5, 160.0, 141.5, 141.5, 139.5, 139.4, 138.5, 128.2, 128.1, 127.2, 127.1, 125.5, 125.4, 124.9, 124.8, 108.1, 98.4, 82.9, 82.8, 76.3, 54.8, 42.7, 41.6, 39.4, 39.3, 20.5; IR (neat) 3024, 2938, 2836, 1648, 1596, 1460, 1429, 1346, 1310, 1294, 1275, 1205, 1152, 1089, 1059, 998, 856, 751, 699; LRMS-ESI ( $m/z$ ): 495.2 ( $\text{M} + \text{H}^+$ ); Anal. Calcd. For  $\text{C}_{31}\text{H}_{30}\text{N}_2\text{O}_4$ : C, 75.28; H, 6.11; N, 5.66; Found: C, 75.13; H, 6.12; N, 5.60.

### 3. General procedure for the Synthesis of Chiral 2, 3-dihydrofuran.

$\text{CuCl}$  (2.5 mg, 0.025 mmol),  $\text{AgSbF}_6$  (8.6 mg, 0.025 mmol), **L4** (13 mg, 0.03 mmol), 200 mg M.S. 4Å, and  $\text{CH}_2\text{Cl}_2$  (2 mL) were stirred under nitrogen for 1 hour at room temperature. Then the substrate (0.5 mmol) was added, and the mixture was stirred for another 5 min. Then, a solution of the 2,6-diisopropylphenyl diazoacetate (**2**) (492 mg, 2.0 mmol) in  $\text{CH}_2\text{Cl}_2$  (2.0 mL) was dropwise added through a syringe pump for 9-10 hours. After another 1 h of stirring at room temperature, the mixture was filtered through a thin layer (40 mm) of silica gel (100-200 mesh), and washed with DCM to remove the catalyst. The filtrate was concentrated under reduced pressure, and the residue was purified by flash chromatography.

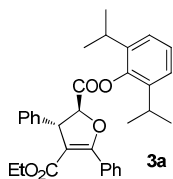

#### (2S,3S)-2-(2,6-diisopropylphenyl) 4-ethyl 3,5-diphenyl-2,3-dihydrofuran-2,4-dicarboxylate

Purified by flash chromatography that filled with silica gel (400 mesh), PE/EtOAc = 15/1 as eluate. Yield : 82%.  $^1\text{H}$  NMR (300 MHz,  $\text{CDCl}_3$ ):  $\delta$  8.02 (dd,  $J$  = 1.5 Hz, 8.1 Hz, 2H), 7.47-7.16 (m, 11H), 5.29 (d,  $J$  = 3.3 Hz, 1H), 4.89 (d,  $J$  = 3.6 Hz, 1H), 4.13-3.96 (m, 2H), 2.95 (br, 2H), 1.24-1.06 (m, 15H); The ee of **3a** listed in **table 3** was determined by HPLC analysis using a Chiralpak AD column with Hexane/*i*-PrOH 95/5 as eluent, 314 nm, Flow = 0.6 mL/min, ee = 96%,  $t_r$  (minor) = 7.06 min,  $t_r$  (major) = 18.01 min;  $[\alpha]_{\text{D}}^{20}$  = + 185.8° ( $c$  = 0.97,  $\text{CHCl}_3$ ).

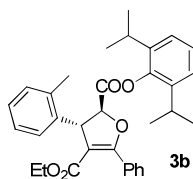

**(2S,3S)-2-(2,6-diisopropylphenyl) 4-ethyl**

**5-phenyl-3-(o-tolyl)-2,3-dihydrofuran-2,4-dicarboxylate**

Purified by flash chromatography that filled with silica gel (400 mesh), PE/EtOAc = 15/1 as eluate. Yield: 71%.  $^1\text{H}$  NMR (300 MHz,  $\text{CDCl}_3$ ):  $\delta$  8.06 (d,  $J$  = 6.0 Hz, 2H), 7.45-7.16 (m, 10H), 5.19 (dd,  $J$  = 3.0 Hz, 10.2 Hz, 2H), 4.10-3.96 (m, 2H), 2.98 (br, 2H), 2.56 (s, 3H), 1.27-1.04 (m, 15H); The ee of **3b** listed in **table 3** was determined by HPLC analysis using a Chiralpak AD column with Hexane/*i*-PrOH 95/5 as eluent, 314 nm, Flow = 0.6 mL/min, ee = 95%,  $t_r$  (minor) = 5.98 min,  $t_r$  (major) = 11.32 min;  $[\alpha]_D^{20}$  = + 199.1° ( $c$  = 1.02,  $\text{CHCl}_3$ ).

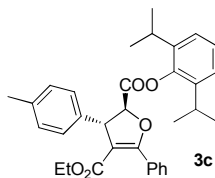

**(2S,3S)-2-(2,6-diisopropylphenyl) 4-ethyl**

**5-phenyl-3-(p-tolyl)-2,3-dihydrofuran-2,4-dicarboxylate**

Purified by flash chromatography that filled with silica gel (400 mesh), PE/EtOAc = 15/1 as eluate. Yield: 89%.  $^1\text{H}$  NMR (300 MHz,  $\text{CDCl}_3$ ):  $\delta$  8.02 (d,  $J$  = 8.4 Hz, 2H), 7.42-7.15 (m, 10H), 5.28 (d,  $J$  = 3.6 Hz, 1H), 4.87 (d,  $J$  = 3.6 Hz, 1H), 4.13-3.95 (m, 2H), 2.96 (br, 2H), 2.34 (s, 3H), 1.24-1.06 (m, 15H); The ee of **3c** listed in **table 3** was determined by HPLC analysis using a Chiralpak AD column with Hexane/*i*-PrOH 95/5 as eluent, 314 nm, Flow = 0.6 mL/min, ee = 95%,  $t_r$  (minor) = 7.29 min,  $t_r$  (major) = 20.29 min;  $[\alpha]_D^{20}$  = + 332.7° ( $c$  = 1.00,  $\text{CHCl}_3$ ).

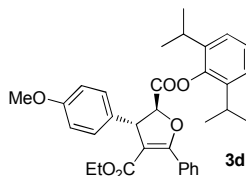

**(2S,3S)-2-(2,6-diisopropylphenyl) 4-ethyl**

**3-(4-methoxyphenyl)-5-phenyl-2,3-dihydrofuran-2,4-dicarboxylate**

Purified by flash chromatography that filled with silica gel (400 mesh), PE/EtOAc = 15/1 as eluate. Yield: 85%.  $^1\text{H}$  NMR (300 MHz,  $\text{CDCl}_3$ ):  $\delta$  8.02 (dd,  $J$  = 0.9 Hz, 6.6 Hz, 2H), 7.43-7.16 (m, 8H), 6.91 (d,  $J$  = 8.4 Hz, 2H), 5.27 (d,  $J$  = 3.9 Hz, 1H), 4.86 (d,  $J$  = 3.6 Hz, 1H), 4.11-3.99 (m, 2H), 3.77 (s, 3H), 2.96 (br, 2H), 1.24-1.07 (m, 15H); The ee of **3d** listed in **table 3** was determined by HPLC analysis using a Chiralpak AD column with Hexane/*i*-PrOH 97/3 as eluent, 314 nm, Flow = 0.6 mL/min, ee = 90%,  $t_r$  (minor) = 10.02 min,  $t_r$  (major) = 25.71 min;  $[\alpha]_D^{20}$  = + 186.2  $^\circ$  ( $c$  = 1.06,  $\text{CHCl}_3$ ).

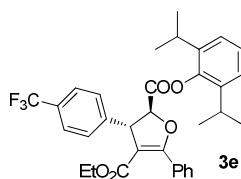

**(2S,3S)-2-(2,6-diisopropylphenyl) 4-ethyl**

**5-phenyl-3-(4-(trifluoromethyl)phenyl)-2,3-dihydrofuran-2,4-dicarboxylate**

Purified by flash chromatography that filled with silica gel (400 mesh), PE/EtOAc = 15/1 as eluate. Yield: 82%.  $^1\text{H}$  NMR (300 MHz,  $\text{CDCl}_3$ ):  $\delta$  8.04 (d,  $J$  = 6.3 Hz, 2H), 7.67 (d,  $J$  = 8.1 Hz, 2H), 7.56 (d,  $J$  = 8.1 Hz, 2H), 7.47-7.43 (m, 3H), 7.24-7.17 (m, 3H), 5.29 (d,  $J$  = 3.0 Hz, 1H), 4.99 (d,  $J$  = 3.6 Hz, 1H), 4.14-3.97 (m, 2H), 2.95 (br, 2H), 1.25-1.06 (m, 15H); The ee of **3e** listed in **table 3** was determined by HPLC analysis using a Chiralpak AD column with Hexane/*i*-PrOH 95/5 as eluent, 314 nm, Flow = 0.6 mL/min, ee = 90%,  $t_r$  (minor) = 6.51 min,  $t_r$  (major) = 11.69 min;  $[\alpha]_D^{20}$  = + 175.3  $^\circ$  ( $c$  = 1.01,  $\text{CHCl}_3$ ).

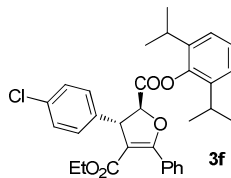

**(2S,3S)-2-(2,6-diisopropylphenyl) 4-ethyl**

**3-(4-chlorophenyl)-5-phenyl-2,3-dihydrofuran-2,4-dicarboxylate**

Purified by flash chromatography that filled with silica gel (400 mesh), PE/EtOAc = 15/1 as eluate. Yield: 93%.  $^1\text{H}$  NMR (300 MHz,  $\text{CDCl}_3$ ):  $\delta$  8.03 (d,  $J$  = 6.3 Hz, 2H), 7.44-7.17 (m, 10H), 5.25 (d,  $J$  = 3.3 Hz, 1H), 4.87 (d,  $J$  = 3.3 Hz, 1H), 4.11-3.99 (m, 2H), 2.94 (br, 2H), 1.24-1.06 (m, 15H);

The ee of **3f** listed in **table 3** was determined by HPLC analysis using a Chiralpak AD column with Hexane/*i*-PrOH 95/5 as eluent, 314 nm, Flow = 0.6 mL/min, ee = 96%,  $t_r$  (minor) = 7.20 min,  $t_r$  (major) = 19.38 min;  $[\alpha]_D^{20} = +205.3^\circ$  ( $c = 0.99$ ,  $\text{CHCl}_3$ ).

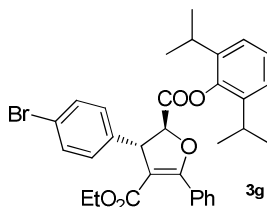

**(2S,3S)-2-(2,6-diisopropylphenyl) 4-ethyl**

**3-(4-bromophenyl)-5-phenyl-2,3-dihydrofuran-2,4-dicarboxylate**

Purified by flash chromatography that filled with silica gel (400 mesh), PE/EtOAc = 15/1 as eluate. Yield: 81%.  $^1\text{H}$  NMR (400 MHz,  $\text{CDCl}_3$ ):  $\delta$  8.01-7.98 (m, 2H), 7.53-7.42 (m, 5H), 7.30-7.17 (m, 5H), 5.23 (d,  $J = 3.2$  Hz, 1H), 4.83 (d,  $J = 3.6$  Hz, 1H), 4.12-3.99 (m, 2H), 2.91 (br, 2H), 1.23-1.08 (m, 15H); The ee of **3g** listed in **table 3** was determined by HPLC analysis using a Chiralpak AD column with Hexane/*i*-PrOH 95/5 as eluent, 314 nm, Flow = 0.6 mL/min, ee = 96%,  $t_r$  (minor) = 7.40 min,  $t_r$  (major) = 19.04 min;  $[\alpha]_D^{20} = +193.5^\circ$  ( $c = 1.01$ ,  $\text{CHCl}_3$ ).

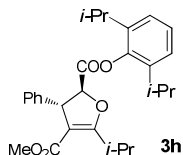

**(2S,3S)-2-(2,6-diisopropylphenyl) 4-methyl**

**5-isopropyl-3-phenyl-2,3-dihydrofuran-2,4-dicarboxylate**

Purified by flash chromatography that filled with silica gel (400 mesh), PE/EtOAc = 15/1 as eluate. Yield: 79%.  $^1\text{H}$  NMR (300 MHz,  $\text{CDCl}_3$ ):  $\delta$  7.39-7.17 (m, 8H), 5.12 (d,  $J = 3.9$  Hz, 1H), 4.63 (d,  $J = 3$  Hz, 1H), 3.80 (hep,  $J = 6.3$  Hz, 1H), 3.60 (s, 3H), 2.91 (hep,  $J = 6.3$  Hz, 2H), 1.34-1.17 (m, 18H);  $^{13}\text{C}$  NMR (100 MHz,  $\text{CDCl}_3$ ):  $\delta$  176.5, 168.9, 165.0, 145.0, 142.2, 140.1, 128.8, 127.4, 126.9, 124.0, 104.4, 85.6, 52.6, 50.9, 27.5, 27.0, 23.4, 19.7, 19.3; IR (neat) 3183, 3065, 3029, 2966, 2872, 1820, 1757, 1709, 1643, 1495, 1468, 1385, 1347, 1306, 1257, 1163, 1114, 1067, 1035, 936, 867, 840, 792, 756, 729, 699, 608; LRMS-ESI ( $m/z$ ): 451.3 ( $\text{M}+\text{H}^+$ ); HRMS-ESI calcd. For  $\text{C}_{28}\text{H}_{35}\text{O}_5^+$  is 451.2484; Found: 451.2475; The ee of **3h** listed in **table 3** was determined by HPLC

analysis using a Chiralpak OD-H column with Hexane/*i*-PrOH 97/3 as eluent, 235 nm, Flow = 0.5 mL/min, ee = 89%,  $t_r$  (major) = 7.59 min,  $t_r$  (minor) = 9.71 min;  $[\alpha]_D^{20} = +207.6^\circ$  (c = 1.07, CHCl<sub>3</sub>).

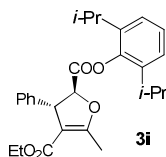

**(2S,3S)-2-(2,6-diisopropylphenyl) 4-ethyl**

**5-methyl-3-phenyl-2,3-dihydrofuran-2,4-dicarboxylate**

Purified by flash chromatography that filled with silica gel (400 mesh), PE/EtOAc = 15/1 as eluate. Yield: 65%. <sup>1</sup>H NMR (300 MHz, CDCl<sub>3</sub>): δ 7.38-7.16 (m, 8H), 5.17 (d, *J* = 4.2 Hz, 1H), 4.67 (d, *J* = 4.2 Hz, 1H), 4.09 (q, *J* = 7.5 Hz, 2H), 2.89 (br, 2H), 2.45 (s, 3H), 1.23-1.09 (m, 15H); <sup>13</sup>C NMR (75 MHz, CDCl<sub>3</sub>): δ 168.7, 168.4, 164.7, 145.0, 142.1, 140.1, 128.7, 127.4, 127.1, 126.9, 124.0, 106.5, 85.7, 59.6, 52.7, 27.6, 22.9, 14.1; IR (neat) 3030, 2965, 2929, 2871, 1774, 1705, 1654, 1456, 1383, 1313, 1250, 1164, 1094, 1029, 938, 841, 783, 757, 700; LRMS-ESI (*m/z*): 437 (M + H<sup>+</sup>); HRMS-ESI calcd. For C<sub>27</sub>H<sub>32</sub>NaO<sub>5</sub><sup>+</sup> is 459.2147; Found: 459.2143; The ee of **3i** listed in **table 3** was determined by HPLC analysis using a Chiralpak AD column with Hexane/*i*-PrOH 98/2 as eluent, 254 nm, Flow = 0.4 mL/min, ee = 90%,  $t_r$  (minor) = 10.61 min,  $t_r$  (major) = 11.73 min;  $[\alpha]_D^{20} = +247.1^\circ$  (c = 1.07, CHCl<sub>3</sub>).

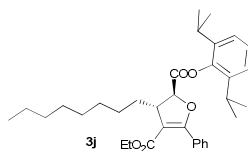

**(2S,3S)-2-(2,6-diisopropylphenyl) 4-ethyl**

**3-octyl-5-phenyl-2,3-dihydrofuran-2,4-dicarboxylate**

Purified by flash chromatography that filled with silica gel (400 mesh), PE/EtOAc = 20/1 as eluate. Yield: 68%. <sup>1</sup>H NMR (300 MHz, CDCl<sub>3</sub>): δ 7.89-7.87 (m, 2H), 7.43-7.35 (m, 3H), 7.23-7.15 (m, 3H), 5.09 (d, *J* = 3.3 Hz, 1H), 4.22-4.12 (m, 2H), 3.73 (tt, *J* = 3.6 Hz, *J* = 8.4 Hz, 1H), 2.91 (br, 2H), 2.00-1.91 (m, 1H), 1.80-1.14 (m, 29H), 0.88-0.86 (m, 3H); <sup>13</sup>C NMR (75 MHz, CDCl<sub>3</sub>): δ 169.7, 164.9, 164.2, 145.1, 140.1, 130.7, 129.7, 129.3, 127.5, 126.8, 123.9, 106.4, 82.0, 59.8, 48.9,

33.9, 31.7, 29.6, 29.2, 29.1, 27.5, 26.2, 23.6, 22.6, 14.1, 14.0; IR (neat): 2962, 2927, 2856, 1754, 1692, 1629, 1447, 1374, 1258, 1219, 1163, 1142, 1084, 1061, 1029, 793, 762, 728, 693; LRMS-EI ( $m/z$ ):  $m/z$  (% relative intensity): 315 ( $M^+$ , 100.00), 343 ( $M^+$ , 38.38); Anal. Calcd. For:  $C_{34}H_{46}O_5$ : C: 76.37, H: 8.67, Found: C: 76.20, H: 8.48; The ee of **3j** listed in **table 3** was determined by HPLC analysis using a Chiralpak AD-H column with Hexane/*i*-PrOH 93/7 as eluent, 320 nm, Flow = 0.7 mL/min, ee = 81%,  $t_r$  (minor) = 5.27 min,  $t_r$  (major) = 8.03 min;  $[\alpha]_D^{20} = +70.0^\circ$  (c = 0.915,  $CHCl_3$ ).

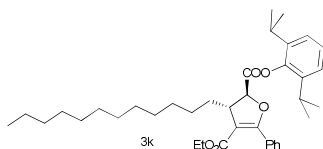

### (2S,3S)-2-(2,6-diisopropylphenyl) 4-ethyl

### 3-dodecyl-5-phenyl-2,3-dihydrofuran-2,4-dicarboxylate

Purified by flash chromatography that filled with silica gel (400 mesh), PE/EtOAc = 20/1 as eluate. Yield: 74%.  $^1H$  NMR (300 MHz,  $CDCl_3$ ):  $\delta$  7.88-8.86 (m, 2H), 7.44-7.38 (m, 3H), 7.24-7.16 (m, 3H), 5.08 (d,  $J = 3.0$  Hz, 1H), 4.22-4.12 (m, 2H), 3.71 (tt,  $J = 3.0$  Hz,  $J = 9.0$  Hz), 2.89 (br, 2H), 2.00-1.90 (m, 1H), 1.77-1.57 (m, 1H), 1.33-1.17 (m, 37 H), 0.90-0.85 (m, 3H);  $^{13}C$  NMR (75 MHz,  $CDCl_3$ ):  $\delta$  169.7, 164.9, 164.2, 145.1, 140.1, 130.7, 129.8, 129.3, 127.5, 126.8, 124.0, 106.5, 82.0, 59.8, 49.0, 33.9, 31.9, 31.4, 30.1, 29.6, 29.6, 29.5, 29.3, 27.5, 26.2, 23.7, 22.6, 14.15, 14.08; IR (neat): 3064, 2962, 2927, 2856, 1755, 1692, 1630, 1493, 1462, 1373, 1313, 1217, 1163, 1143, 1083, 1062, 1030, 966, 848, 827, 792, 762, 727, 693; LRMS-ESI ( $m/z$ ):  $m/z$  (% relative intensity): 315 ( $M^+$ , 100.00), 343 ( $M^+$ , 41.08), 475 ( $M^+$ , 14.57); Anal. Calcd. For:  $C_{38}H_{54}O_5$ : C: 77.25, H: 9.21, Found: C: 77.24, H: 9.07; The ee of **3k** listed in **table 3** was determined by HPLC analysis using a Chiralpak AD-H column with Hexane/*i*-PrOH 95/5 as eluent, 320 nm, Flow = 0.7 mL/min, ee = 78 %,  $t_r$  (minor) = 5.23 min,  $t_r$  (major) = 8.43 min;  $[\alpha]_D^{20} = +63.0^\circ$  (c = 0.978,  $CHCl_3$ ).

### References:

- [1] S. Son and G. C. Fu, *J. Am. Chem. Soc.* **2007**, *129*, 1046.
- [2] J.-L. Zhou, Y. Liang, C. Deng, H.-L. Zhou, Z. Wang, X.-L. Sun, J.-C. Zheng, Z.-X. Yu and Y. Tang, *Angew. Chem. Int. Ed.*, **2011**, *50*, 7874.
- [3] a) J. Li, S.-H. Liao, H. Xiong, Y.-Y. Zhou, X.-L. Sun, Y. Zhang, X.-G. Zhou, and Y. Tang,



*Angew chem. Int. Ed.* **2012**, *51*, 8838; b) J.-H. Chen, S.-H. Liao, X.-L. Sun, Q. Shen, and Y. Tang,

*Tetrahedron*, **2012**, *68*, 5042.

#### 4. X-ray Data of **3g**

Crystal of **3g** suitable for X-ray crystallographic analysis was obtained by recrystallization from petrol ether/DCM. The ORTEP drawing of **3g** is shown in Figure 1 (deposition number: CCDC 915948).

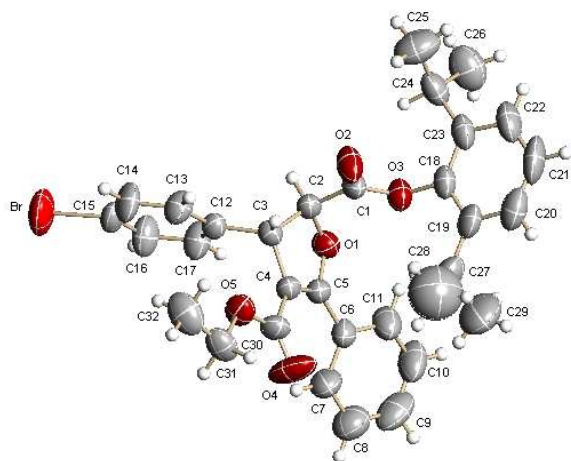

|                              |                                                  |
|------------------------------|--------------------------------------------------|
| Temperature                  | 293 (2) K                                        |
| Radiation                    | MoK $\alpha$                                     |
| $\lambda$ (Å)                | 0.71073                                          |
| Reflections collected/unique | 18158/6845 [(int) = 0.1015]                      |
| Refinement method            | Full-matrix least-squares on F <sup>2</sup>      |
| $\theta$ range (°)           | 1.81–27.50                                       |
| Formula                      | C <sub>32</sub> H <sub>33</sub> BrO <sub>5</sub> |
| Formula weight               | 577.49                                           |
| Crystal size (mm)            | 0.369 x 0.357 x 0.231 mm                         |
| Crystal system               | Orthorhombic                                     |
| Space group                  | P2 (1) 2 (1) 2 (1)                               |
| a (Å)                        | 11.8375 (15)                                     |
| b (Å)                        | 15.0508 (19)                                     |
| c (Å)                        | 16.968 (2)                                       |
| v (Å <sup>3</sup> )          | 3023.0 (7)                                       |
| $\alpha$ (°)                 | 90                                               |
| $\beta$ (°)                  | 90                                               |
| $\gamma$ (°)                 | 90                                               |
| Z                            | 4                                                |
| dcalc (g/cm <sup>3</sup> )   | 1.269                                            |
| Representative bonds: (Å)    |                                                  |
| C(2)–O(1)                    | 1.436(4)                                         |

|            |          |
|------------|----------|
| C(2)-C(1)  | 1.521(5) |
| C(2)-C(3)  | 1.522(5) |
| C(3)-C(12) | 1.527(5) |
| C(3)-C(4)  | 1.519(5) |
| C(4)-C(30) | 1.452(5) |
| C(4)-C(5)  | 1.363(5) |
| C(5)-C(6)  | 1.458(5) |
| C(5)-O(1)  | 1.361(4) |
| C(3)-H(3)  | 0.9800   |
| C(2)-H(2)  | 0.9800   |

## 5. $^1\text{H}$ and $^{13}\text{C}$ NMR spectra

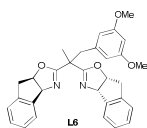

**(3aS,3a'S,8aR,8a'R)-2,2'-(1-(3,5-dimethoxyphenyl)propane-2,2-diyl)bis(8,8a-dihydro-3aH-indeno[1,2-d]oxazole)**

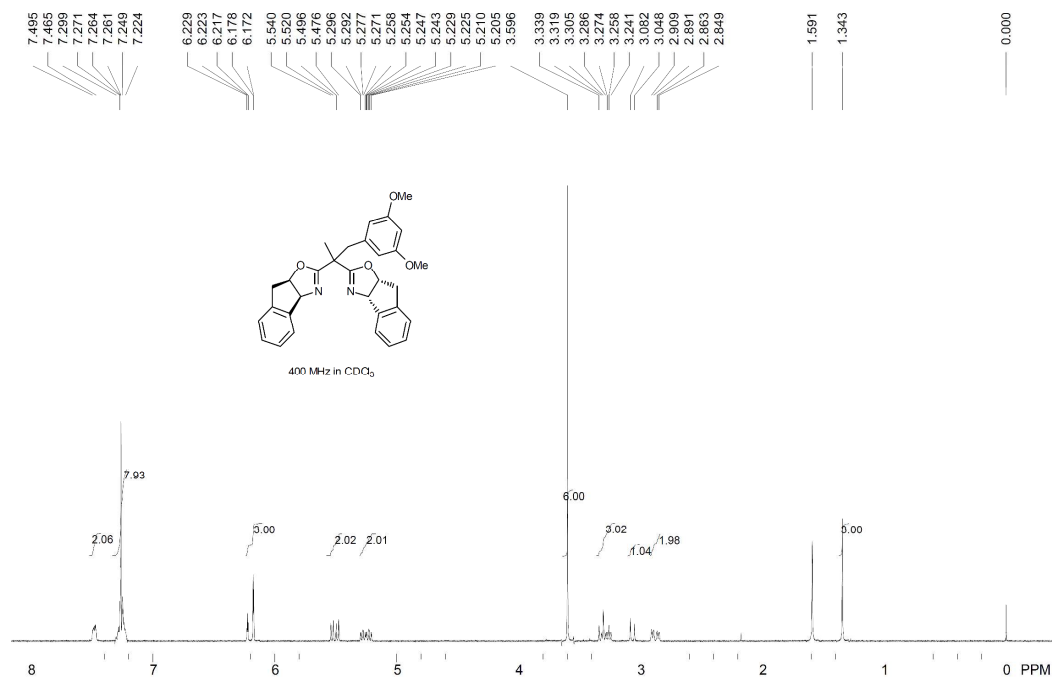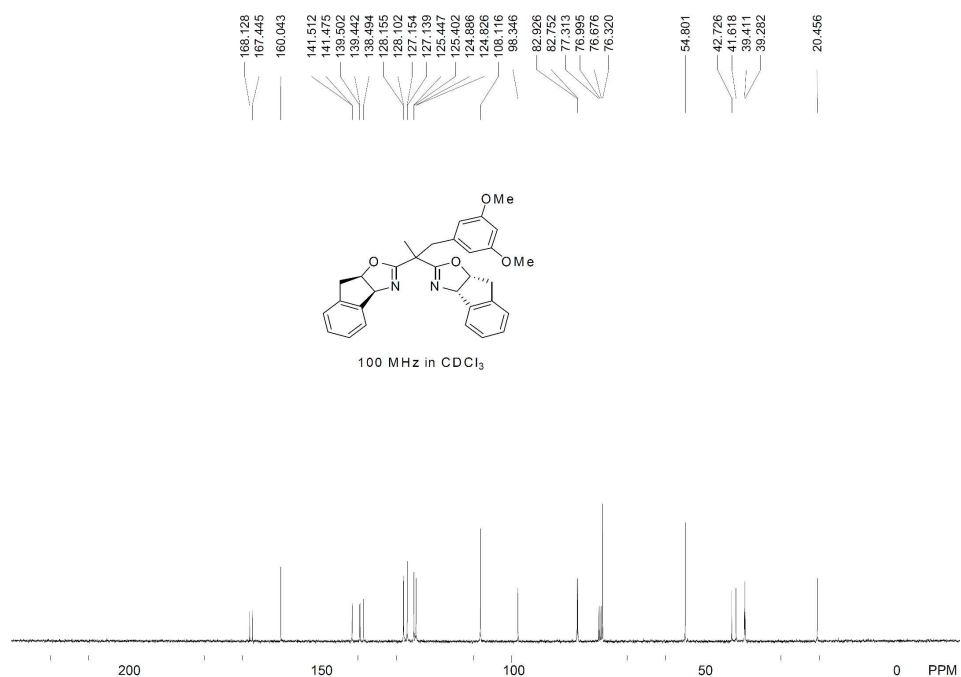

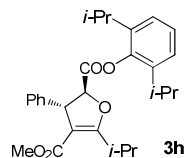

**(2S,3S)-2-(2,6-diisopropylphenyl) 4-methyl**

**5-isopropyl-3-phenyl-2,3-dihydrofuran-2,4-dicarboxylate**

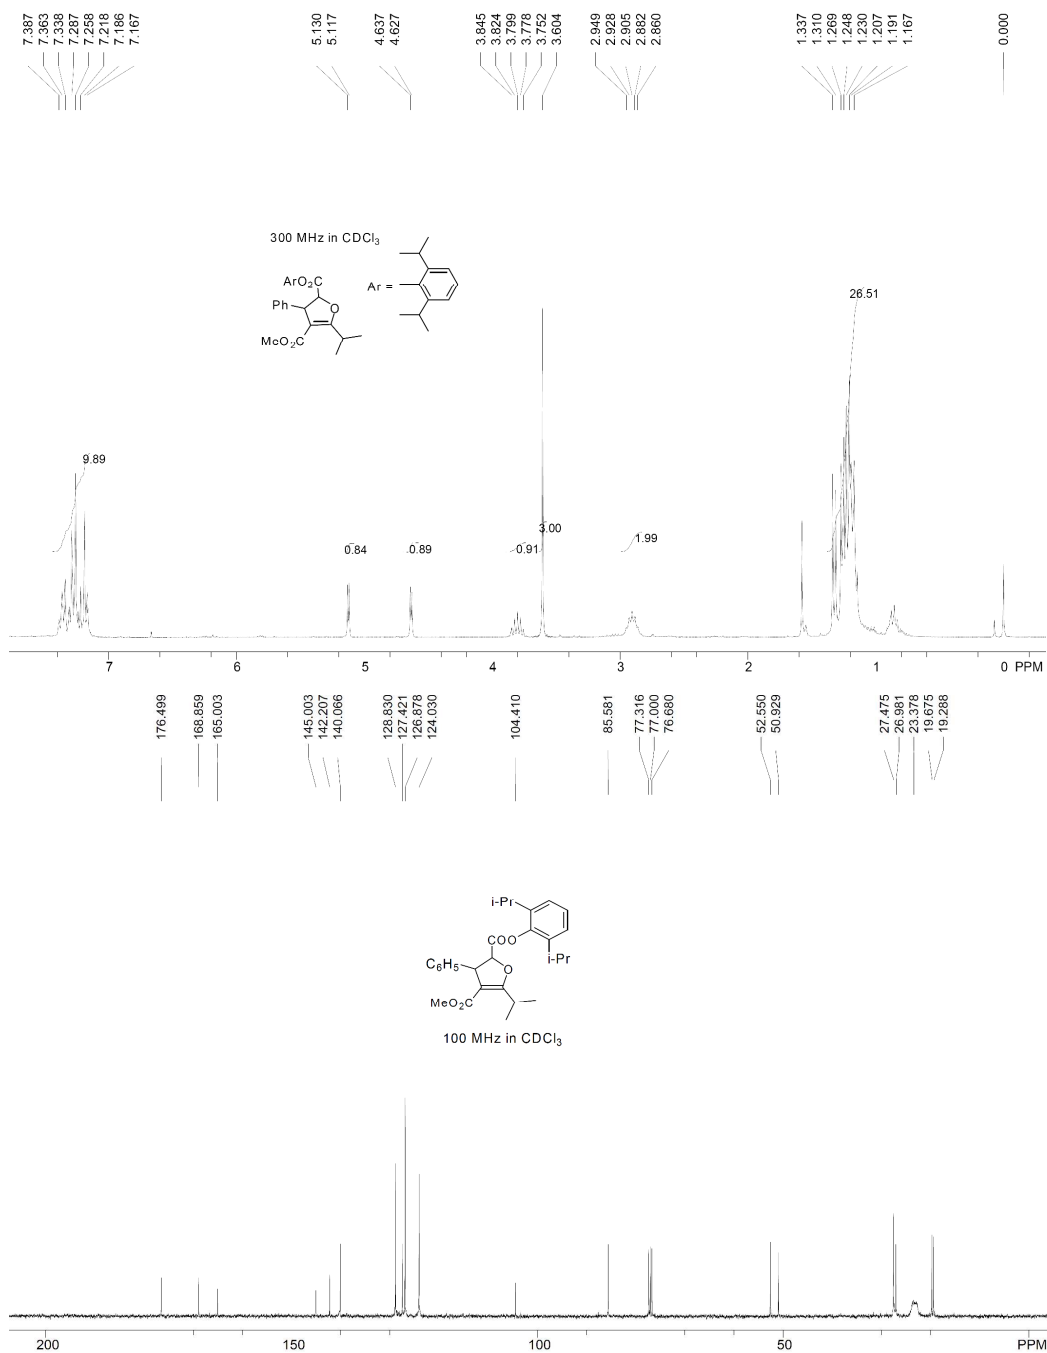

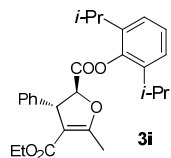

**(2S,3S)-2-(2,6-diisopropylphenyl) 4-ethyl**

**5-methyl-3-phenyl-2,3-dihydrofuran-2,4-dicarboxylate**

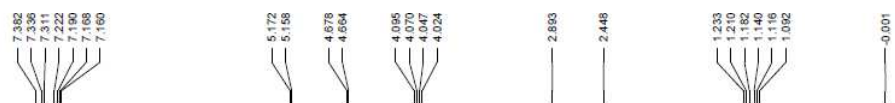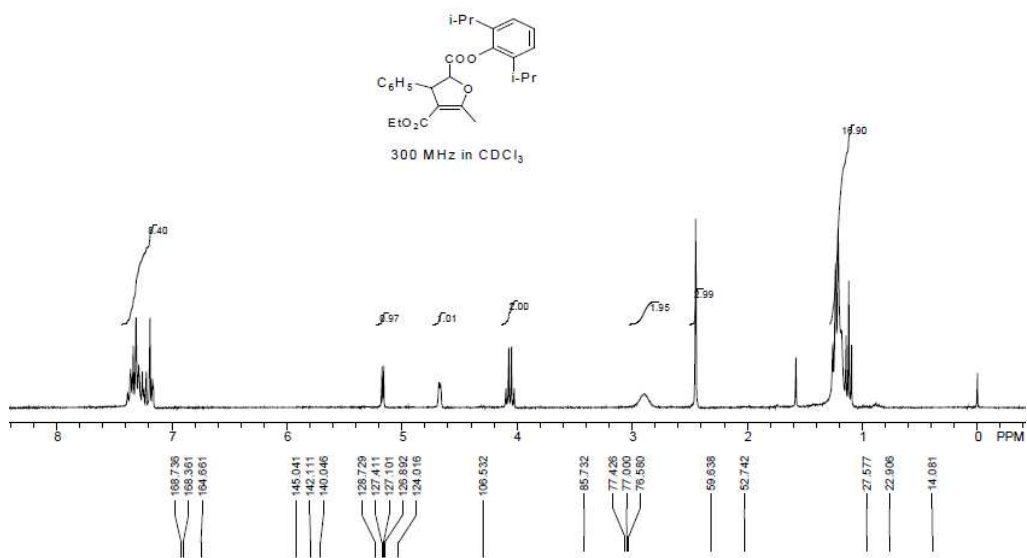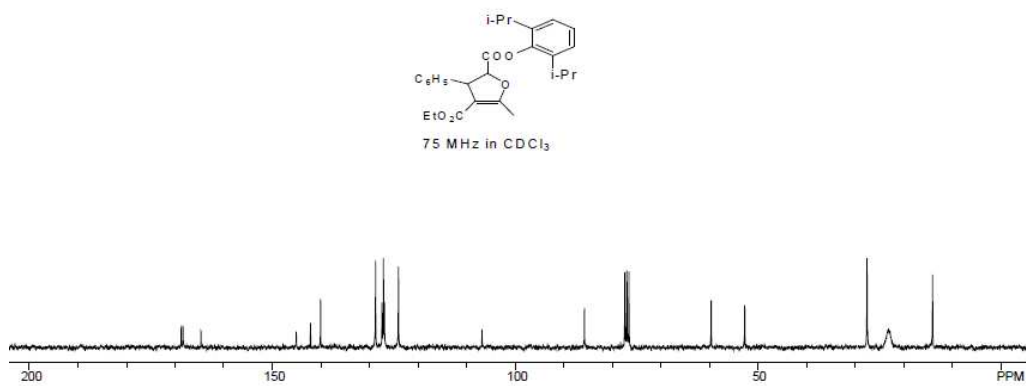

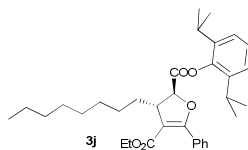

**(2S,3S)-2-(2,6-diisopropylphenyl) 4-ethyl**

**3-octyl-5-phenyl-2,3-dihydrofuran-2,4-dicarboxylate**

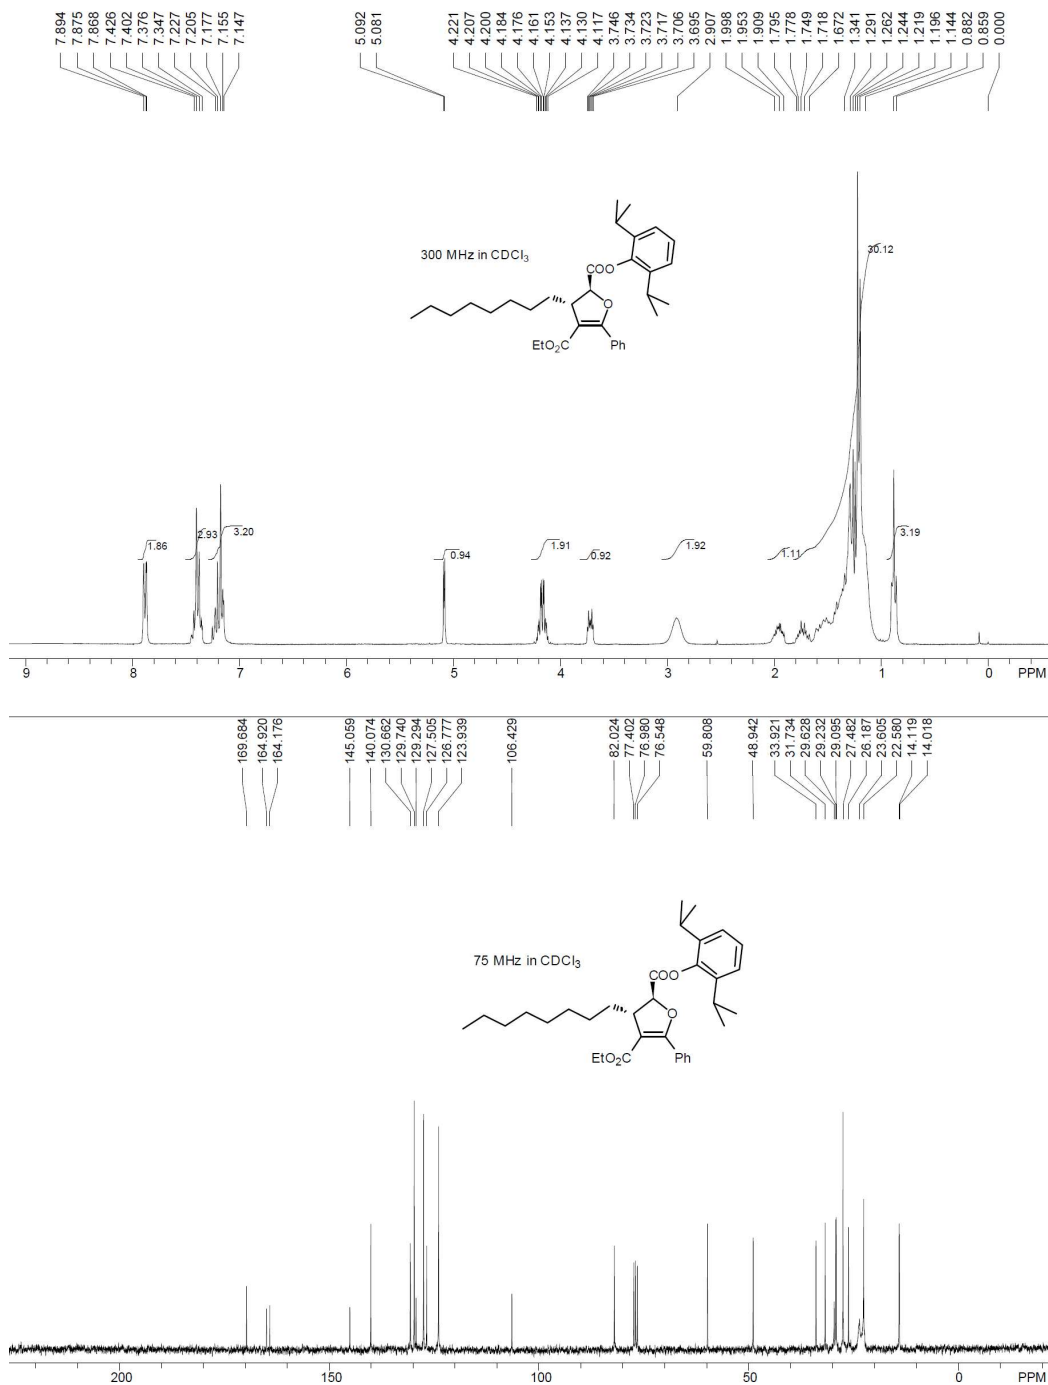

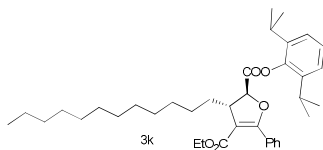

(2S,3S)-2-(2,6-diisopropylphenyl) 4-ethyl

3-dodecyl-5-phenyl-2,3-dihydrofuran-2,4-dicarboxylate

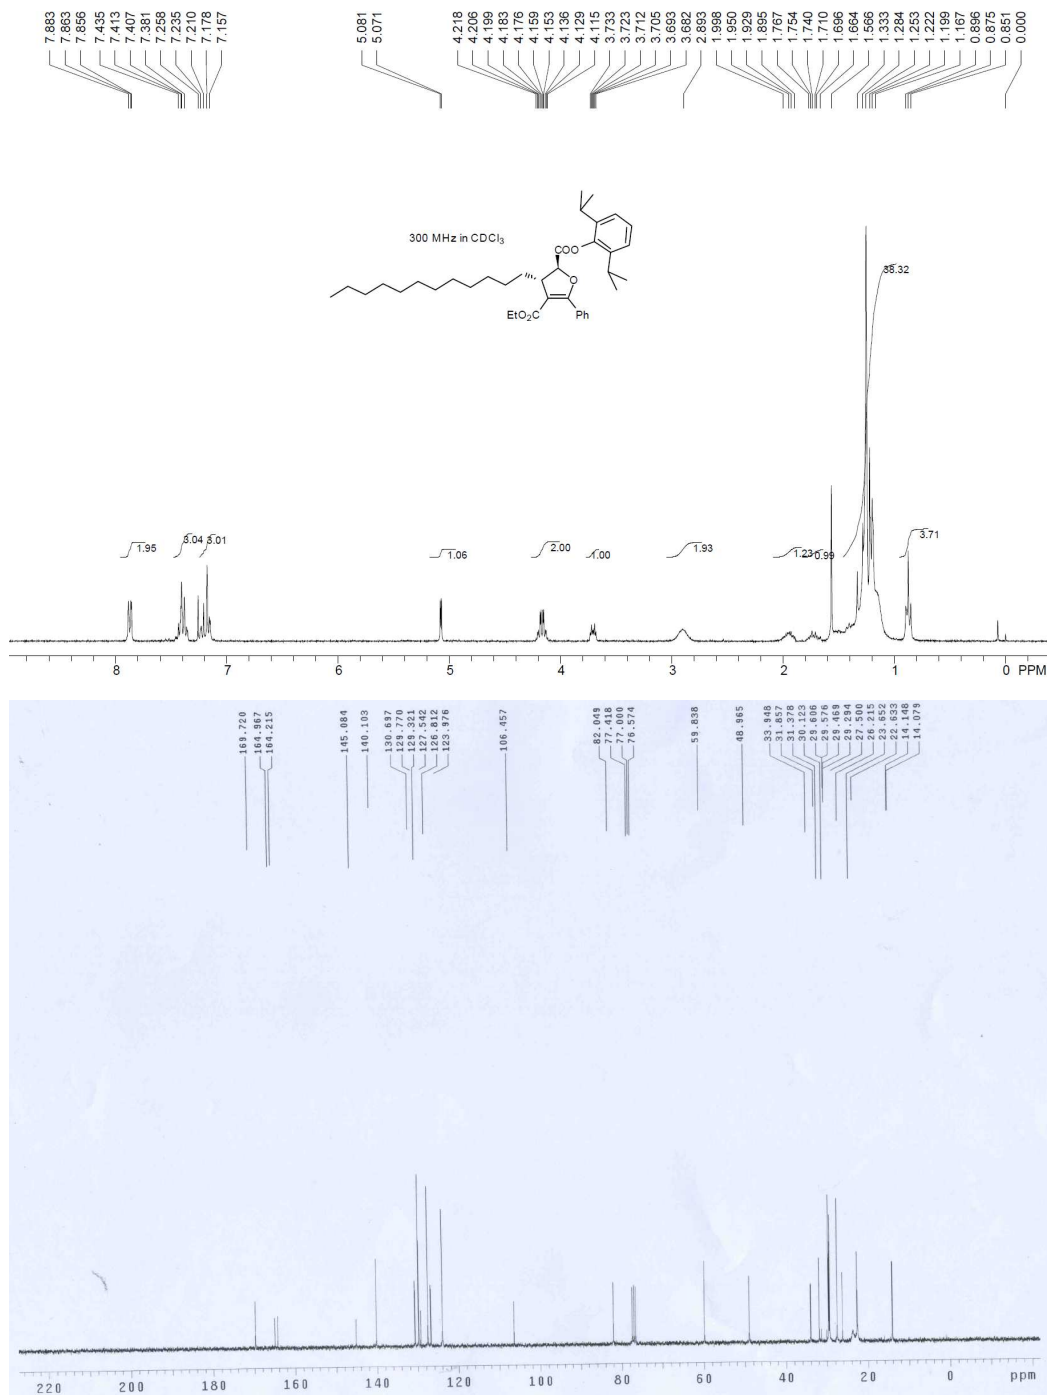

## 6. HPLC spectra

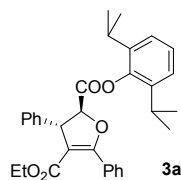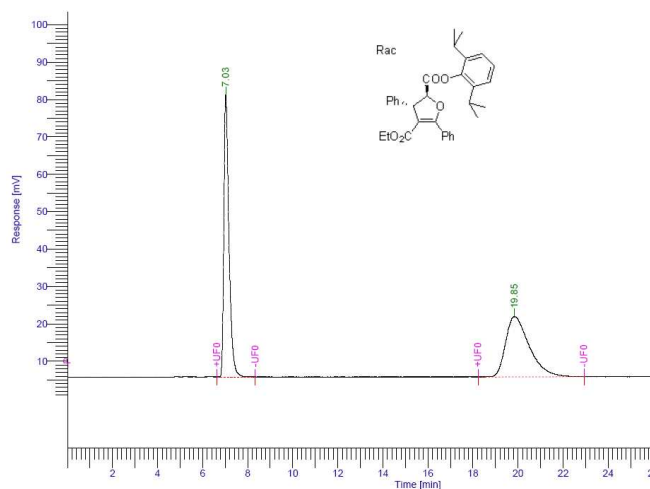

### Jiaolong Zhou HPLC Report

| Peak # | Time [min] | Area [uV*sec] | Height [uV] | Area [%] | Norm. Area [%] |
|--------|------------|---------------|-------------|----------|----------------|
| 1      | 7.03       | 1183485.7777  | 75496.7122  | 50.13    | 50.13          |
| 2      | 19.85      | 1177501.3369  | 16144.4718  | 49.87    | 49.87          |
|        |            | 2360987.1146  | 91641.1840  | 100.00   | 100.00         |

AD column, Hexane/iPrOH 95/5, 0.6 mL/min, 314 nm, 25 oC

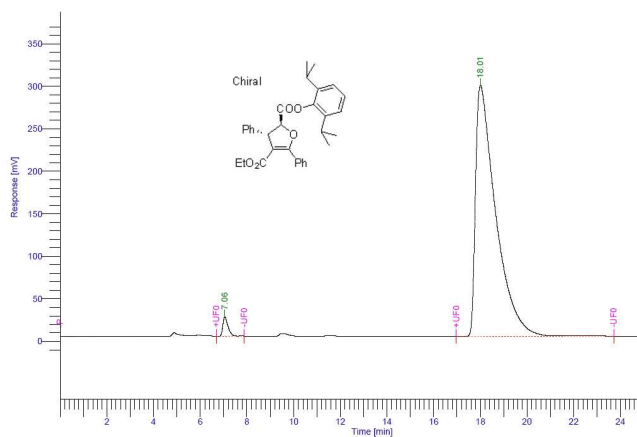

### Jiaolong Zhou HPLC Report

| Peak # | Time [min] | Area [uV*sec] | Height [uV] | Area [%] | Norm. Area [%] |
|--------|------------|---------------|-------------|----------|----------------|
| 1      | 7.06       | 348847.7419   | 22836.6238  | 1.93     | 1.93           |
| 2      | 18.01      | 17690570.7018 | 295245.4500 | 98.07    | 98.07          |
|        |            | 18039418.4437 | 318082.0738 | 100.00   | 100.00         |

AD column, Hexane/iPrOH 95/5, 0.6 mL/min, 314 nm, 25 oC



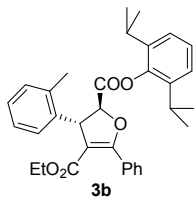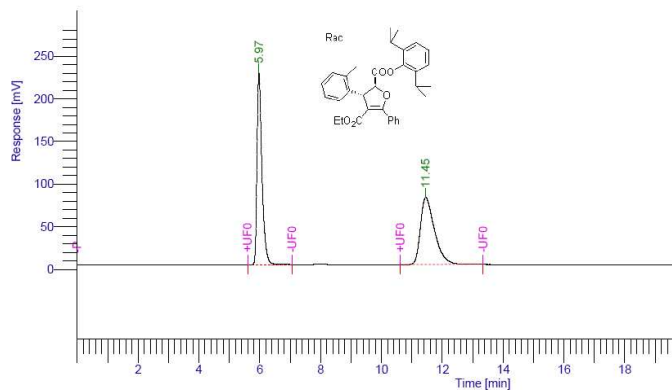

## Jiaolong Zhou HPLC Report

zjl

| Peak # | Time [min] | Area [uV*sec] | Height [uV] | Area [%] | Norm. Area [%] |
|--------|------------|---------------|-------------|----------|----------------|
| 1      | 5.97       | 2.5237e+06    | 2.243e+05   | 50.02    | 50.02          |
| 2      | 11.45      | 2.5217e+06    | 7.858e+04   | 49.98    | 49.98          |
|        |            | 5.0453e+06    | 3.029e+05   | 100.00   | 100.00         |

zjl: AD, Hexane/iPrOH 95/5, 0.6 mL/min, 314 nm

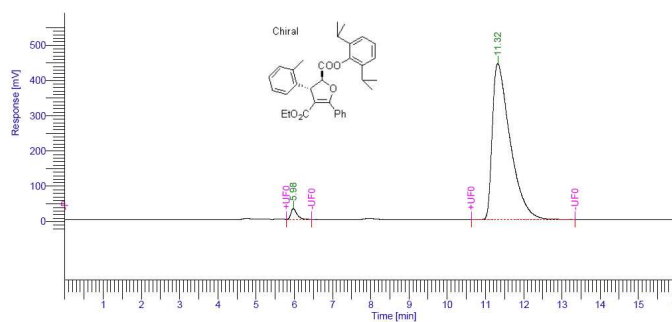

## Jiaolong Zhou HPLC Report

zjl

| Peak # | Time [min] | Area [uV*sec] | Height [uV] | Area [%] | Norm. Area [%] |
|--------|------------|---------------|-------------|----------|----------------|
| 1      | 5.98       | 337700.5983   | 3.055e+04   | 2.30     | 2.30           |
| 2      | 11.32      | 1.4335e+07    | 4.420e+05   | 97.70    | 97.70          |
|        |            | 1.4672e+07    | 4.725e+05   | 100.00   | 100.00         |

zjl: AD, Hexane/iPrOH 95/5, 0.6 mL/min, 314 nm

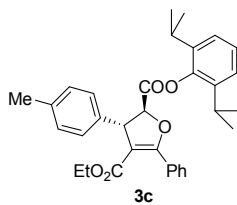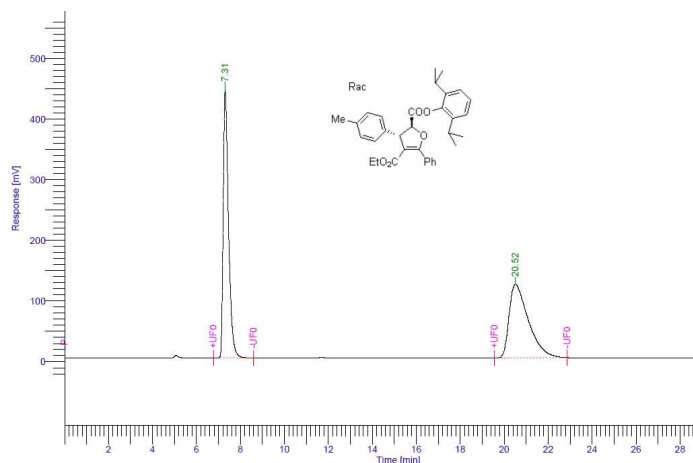

### Jiaolong Zhou HPLC Report

| Peak # | Time [min] | Area [uV*sec] | Height [uV] | Area [%] | Norm. Area [%] |
|--------|------------|---------------|-------------|----------|----------------|
| 1      | 7.31       | 7395780.8240  | 443041.9357 | 50.03    | 50.03          |
| 2      | 20.52      | 7387389.9865  | 121272.8503 | 49.97    | 49.97          |
|        |            | 14783170.8105 | 564314.7860 | 100.00   | 100.00         |

AD column, Hexane/iPrOH 95/5, 0.6 mL/min, 314 nm, 25 °C

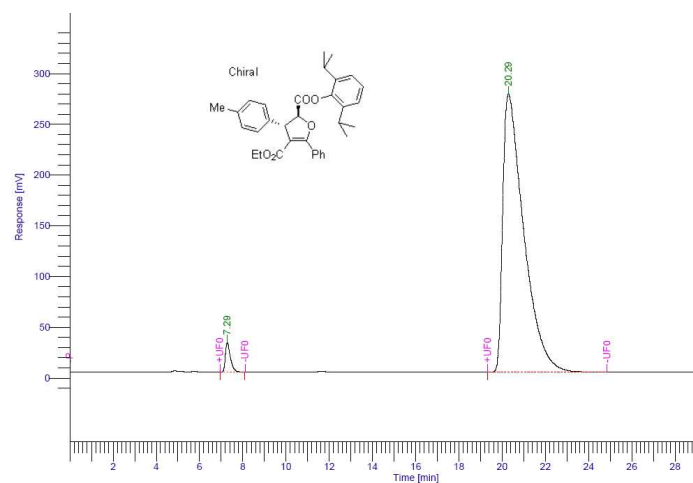

### Jiaolong Zhou HPLC Report

| Peak # | Time [min] | Area [uV*sec] | Height [uV] | Area [%] | Norm. Area [%] |
|--------|------------|---------------|-------------|----------|----------------|
| 1      | 7.29       | 470165.0039   | 29012.2974  | 2.48     | 2.48           |
| 2      | 20.29      | 18468065.1247 | 273997.5033 | 97.52    | 97.52          |
|        |            | 18938230.1286 | 303009.8008 | 100.00   | 100.00         |

AD column, Hexane/iPrOH 95/5, 0.6 mL/min, 314 nm, 25 °C

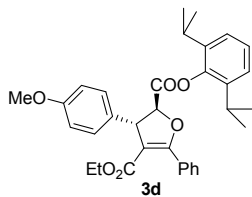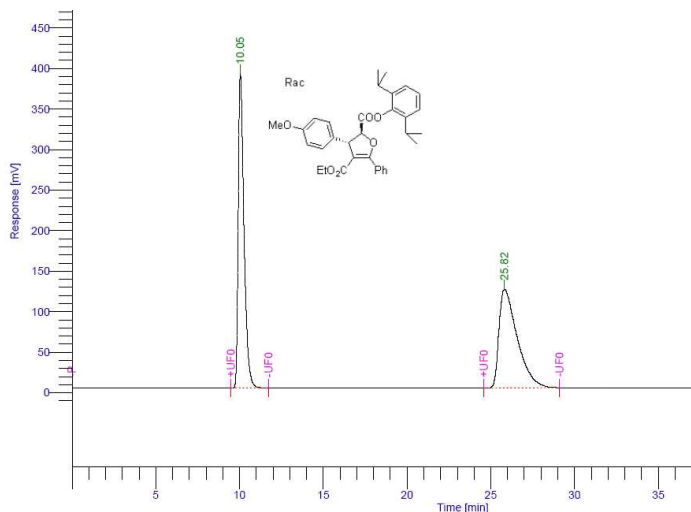

### Jiaolong Zhou HPLC Report

| Peak # | Time [min] | Area [uV*sec] | Height [uV] | Area [%] | Norm. Area [%] |
|--------|------------|---------------|-------------|----------|----------------|
| 1      | 10.05      | 9211558.9533  | 388126.2180 | 49.91    | 49.91          |
| 2      | 25.82      | 9245798.6013  | 122153.8330 | 50.09    | 50.09          |
|        |            | 18457357.5546 | 510280.0510 | 100.00   | 100.00         |

AD column, Hexane/iPrOH 97/3, 0.6 mL/min, 314 nm, 25 °C

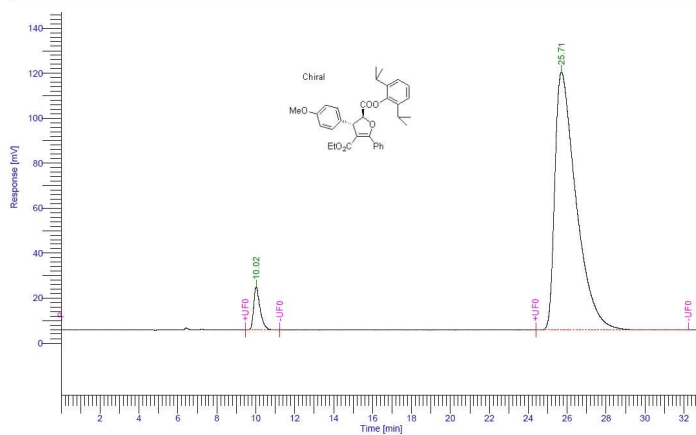

### Jiaolong Zhou HPLC Report

| Peak # | Time [min] | Area [uV*sec] | Height [uV] | Area [%] | Norm. Area [%] |
|--------|------------|---------------|-------------|----------|----------------|
| 1      | 10.02      | 443391.7552   | 19143.4808  | 4.87     | 4.87           |
| 2      | 25.71      | 8669986.4924  | 114583.1057 | 95.13    | 95.13          |
|        |            | 9113378.2475  | 133726.5865 | 100.00   | 100.00         |

AD column, Hexane/iPrOH 97/3, 0.6 mL/min, 314 nm, 25 °C

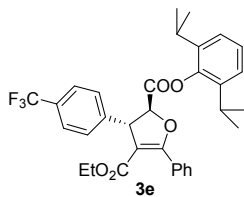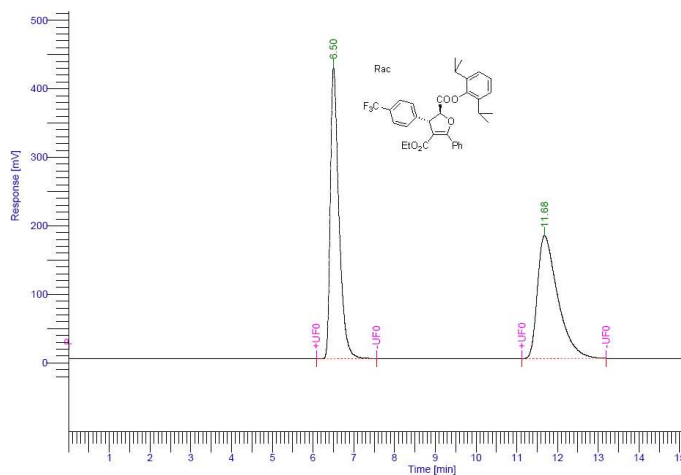

### Jiaolong Zhou HPLC Report

| Peak # | Time [min] | Area [uV*sec] | Height [uV] | Area [%] | Norm. Area [%] |
|--------|------------|---------------|-------------|----------|----------------|
| 1      | 6.50       | 6225211.3002  | 425346.6407 | 50.00    | 50.00          |
| 2      | 11.68      | 6225752.0747  | 179680.0487 | 50.00    | 50.00          |
|        |            | 12450963.3749 | 605026.6893 | 100.00   | 100.00         |

AD column, Hexane/iPrOH 95/5, 0.6 mL/min, 314 nm, 25 oC

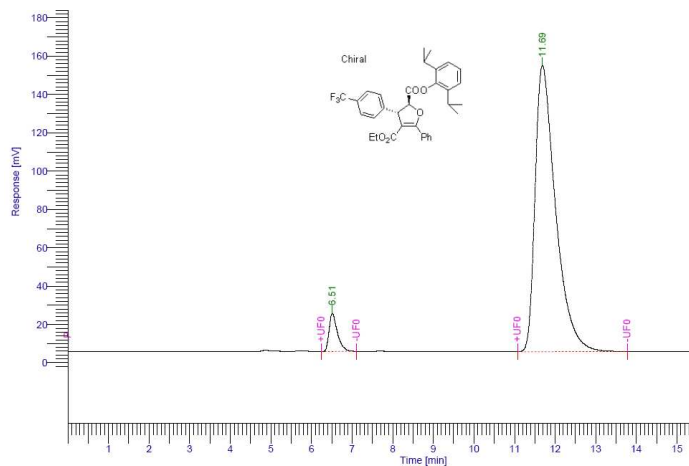

### Jiaolong Zhou HPLC Report

| Peak # | Time [min] | Area [uV*sec] | Height [uV] | Area [%] | Norm. Area [%] |
|--------|------------|---------------|-------------|----------|----------------|
| 1      | 6.51       | 283182.4250   | 19889.2111  | 5.14     | 5.14           |
| 2      | 11.69      | 5227235.2142  | 149371.8095 | 94.86    | 94.86          |
|        |            | 5510417.6392  | 169261.0206 | 100.00   | 100.00         |

AD column, Hexane/iPrOH 95/5, 0.6 mL/min, 314 nm, 25 oC

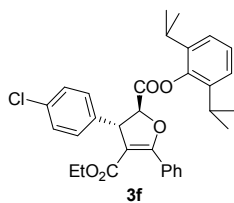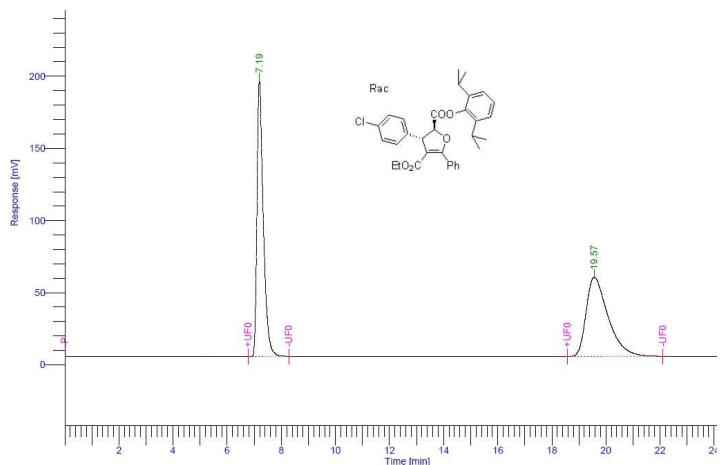

### Jiaolong Zhou HPLC Report

| Peak # | Time [min] | Area [uV*sec] | Height [uV] | Area [%] | Norm. Area [%] |
|--------|------------|---------------|-------------|----------|----------------|
| 1      | 7.19       | 3092696.6699  | 191124.0123 | 49.94    | 49.94          |
| 2      | 19.57      | 3099884.5611  | 54935.6799  | 50.06    | 50.06          |
|        |            | 6192581.2310  | 246059.6922 | 100.00   | 100.00         |

AD column, Hexane/iPrOH 95/5, 0.6 mL/min, 314 nm, 25 oC

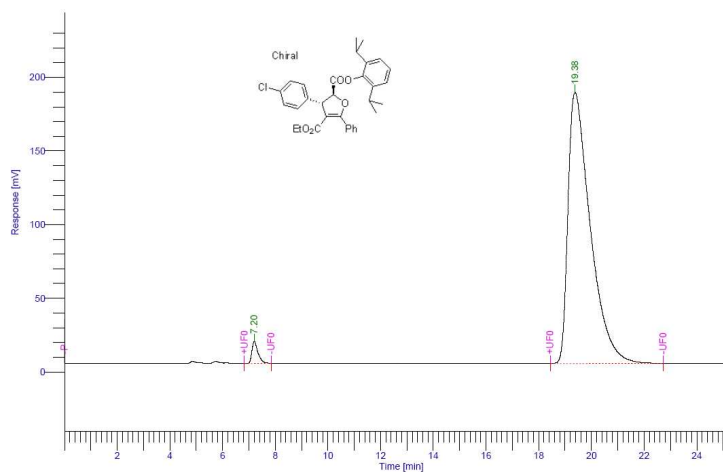

### Jiaolong Zhou HPLC Report

| Peak # | Time [min] | Area [uV*sec] | Height [uV] | Area [%] | Norm. Area [%] |
|--------|------------|---------------|-------------|----------|----------------|
| 1      | 7.20       | 238571.8736   | 14964.6312  | 2.16     | 2.16           |
| 2      | 19.38      | 10789690.2978 | 184213.0722 | 97.84    | 97.84          |
|        |            | 11028262.1714 | 199177.7034 | 100.00   | 100.00         |

AD column, Hexane/iPrOH 95/5, 0.6 mL/min, 314 nm, 25 oC

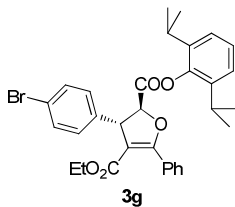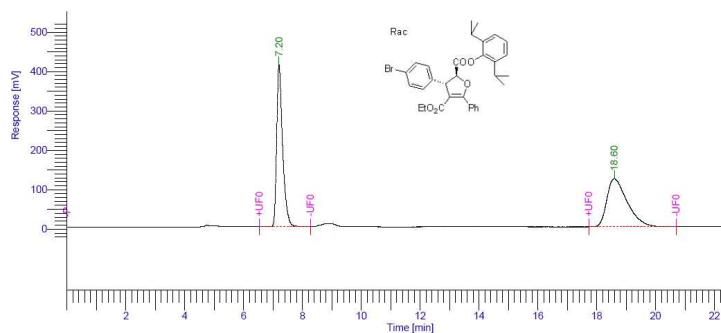

## Jiaolong Zhou HPLC Report

Zjl

| Peak # | Time [min] | Area [uV*sec] | Height [uV] | Area [%] | Norm. Area [%] |
|--------|------------|---------------|-------------|----------|----------------|
| 1      | 7.20       | 5.8282e+06    | 4.119e+05   | 49.81    | 49.81          |
| 2      | 18.60      | 5.8716e+06    | 1.219e+05   | 50.19    | 50.19          |
|        |            | 1.1700e+07    | 5.338e+05   | 100.00   | 100.00         |

Zjl: AD, Hexane/iPrOH 95/5, 0.6 mL/min, 314 nm

Page 2 of 2

12/4/2009 11:15:25 AM Result:

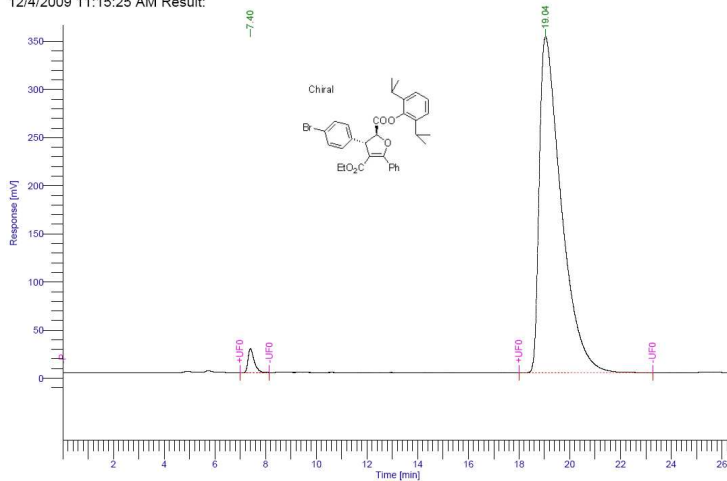

## Jiaolong Zhou HPLC Report

| Peak # | Time [min] | Area [uV*sec] | Height [uV] | Area [%] | Norm. Area [%] |
|--------|------------|---------------|-------------|----------|----------------|
| 1      | 7.40       | 416025.5228   | 25120.9748  | 1.95     | 1.95           |
| 2      | 19.04      | 20933961.7220 | 349045.9696 | 98.05    | 98.05          |
|        |            | 21349987.2448 | 374166.9644 | 100.00   | 100.00         |

AD column, Hexane/iPrOH 95/5, 0.6 mL/min, 314 nm, 25 oC

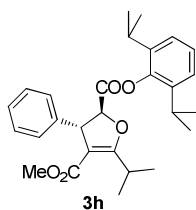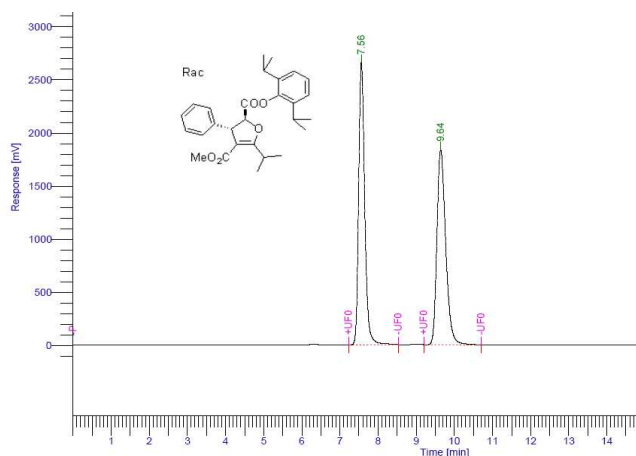

## Jiaolong Zhou HPLC Report

| Peak # | Time [min] | Area [uV*sec] | Height [uV]  | Area [%] | Norm. Area [%] |
|--------|------------|---------------|--------------|----------|----------------|
| 1      | 7.56       | 29435025.2148 | 2655142.3186 | 50.01    | 50.01          |
| 2      | 9.64       | 29424222.6066 | 1834432.8502 | 49.99    | 49.99          |
|        |            | 58859247.8214 | 4489575.1688 | 100.00   | 100.00         |

Warning -- Signal level out-of-range in peak

OD-H column, Hexane/iPrOH 97/3, 0.5 mL/min, 235 nm, 25 °C

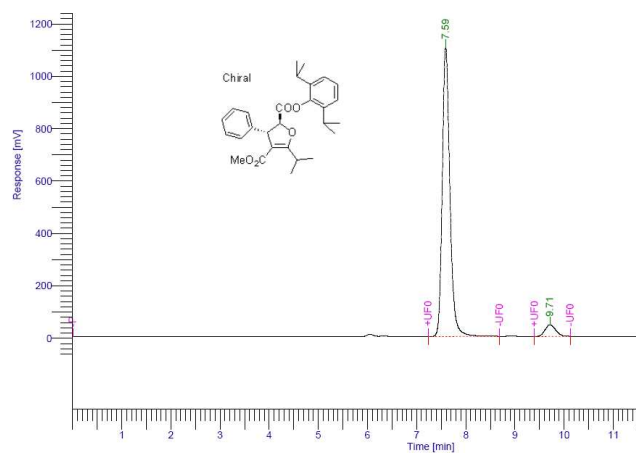

## Jiaolong Zhou HPLC Report

| Peak # | Time [min] | Area [uV*sec] | Height [uV]  | Area [%] | Norm. Area [%] |
|--------|------------|---------------|--------------|----------|----------------|
| 1      | 7.59       | 11953859.2233 | 1104391.9837 | 94.58    | 94.58          |
| 2      | 9.71       | 685537.9996   | 44769.3137   | 5.42     | 5.42           |
|        |            | 12639397.2229 | 1149161.2974 | 100.00   | 100.00         |

OD-H column, Hexane/iPrOH 97/3, 0.5 mL/min, 235 nm, 25 °C

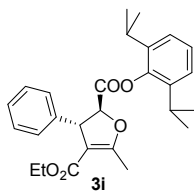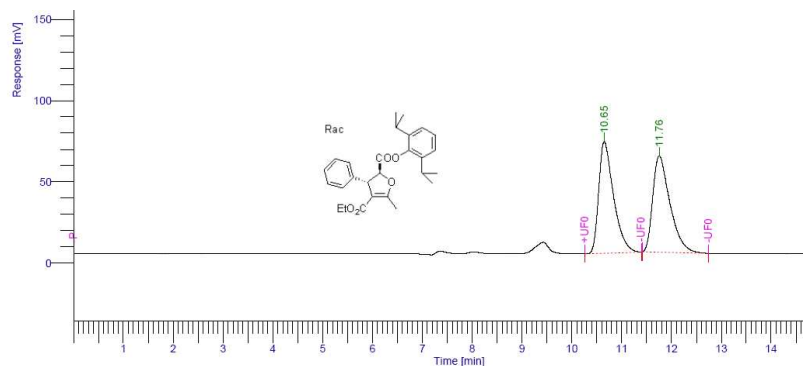

### Jiaolong Zhou HPLC Report

| Peak # | Time [min] | Area [uV*sec] | Height [uV] | Area [%] | Norm. Area [%] | Area/Height [s] | Absorbance Ratio |
|--------|------------|---------------|-------------|----------|----------------|-----------------|------------------|
| 1      | 10.65      | 1419783.5621  | 68677.1863  | 49.90    | 49.90          | 20.6733         | -----            |
| 2      | 11.76      | 1425412.9965  | 59362.0071  | 50.10    | 50.10          | 24.0122         | -----            |
|        |            | 2845196.5586  | 128039.1935 | 100.00   | 100.00         |                 | 0.0000           |

AD column, Hexane/iPrOH 98/2, 0.4 mL/min, 254 nm, 25 oC

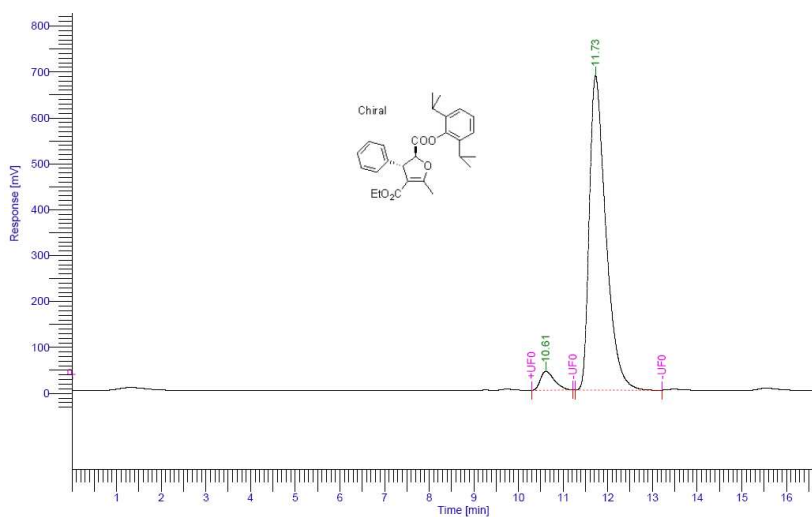

### Jiaolong Zhou HPLC Report

| Peak # | Time [min] | Area [uV*sec] | Height [uV] | Area [%] | Norm. Area [%] |
|--------|------------|---------------|-------------|----------|----------------|
| 1      | 10.61      | 904455.4561   | 41689.5039  | 4.89     | 4.89           |
| 2      | 11.73      | 17583418.2491 | 685118.1619 | 95.11    | 95.11          |
|        |            | 18487873.7052 | 726807.6658 | 100.00   | 100.00         |

AD column, Hexane/iPrOH 98/2, 0.4 mL/min, 254 nm, 25 oC



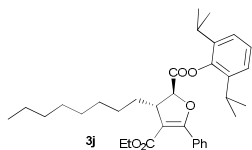

Description : AD-H; 320 nm; Flow = 0.7 mL/min; i-PrOH/Hexane = 7/93

### <Chromatogram>

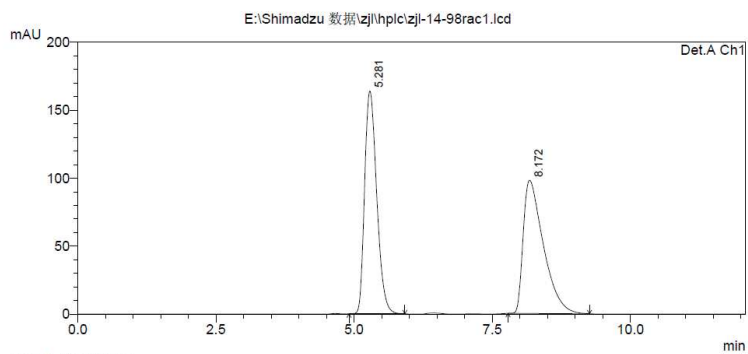

| PeakTable |           |         |        |         |          |
|-----------|-----------|---------|--------|---------|----------|
| Peak#     | Ret. Time | Area    | Height | Area %  | Height % |
| 1         | 5.281     | 2495681 | 163981 | 50.073  | 62.599   |
| 2         | 8.172     | 2488419 | 97973  | 49.927  | 37.401   |
| Total     |           | 4984100 | 261953 | 100.000 | 100.000  |

Description : AD-H; 320 nm; Flow = 0.7 mL/min; i-PrOH/Hexane = 7/93

### <Chromatogram>

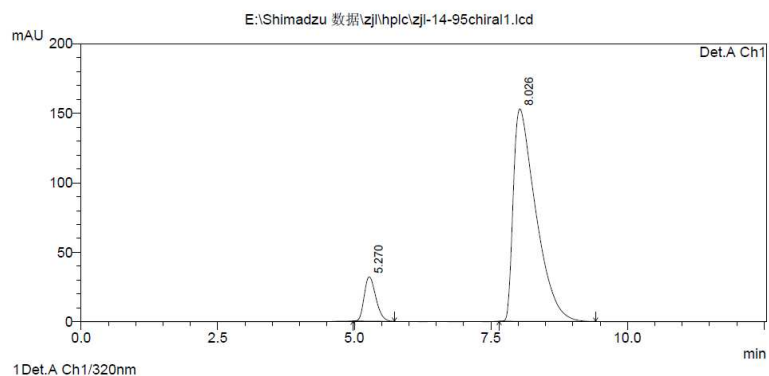

| PeakTable |           |         |        |         |          |
|-----------|-----------|---------|--------|---------|----------|
| Peak#     | Ret. Time | Area    | Height | Area %  | Height % |
| 1         | 5.270     | 471322  | 31900  | 9.684   | 17.268   |
| 2         | 8.026     | 4395945 | 152833 | 90.316  | 82.732   |
| Total     |           | 4867267 | 184733 | 100.000 | 100.000  |

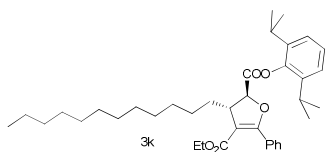

Description : AD-H; 320 nm; Flow = 0.7 mL/min; i-PrOH/Hexane = 5/95

# <Chromatogram>

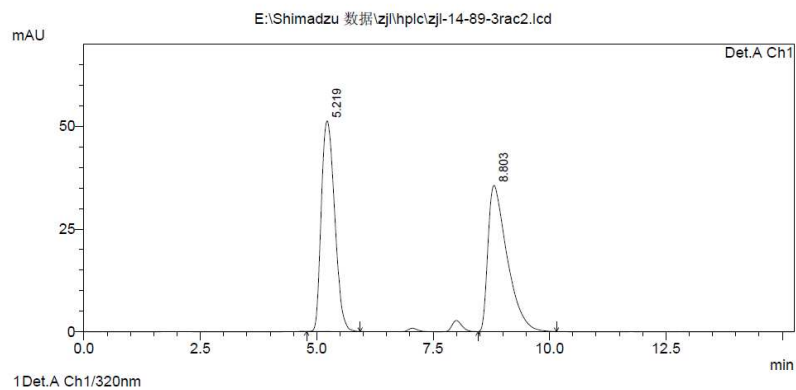

| PeakTable |           |         |        |         |          |
|-----------|-----------|---------|--------|---------|----------|
| Peak#     | Ret. Time | Area    | Height | Area %  | Height % |
| 1         | 5.219     | 1023495 | 51209  | 50.116  | 59.017   |
| 2         | 8.803     | 1018744 | 35560  | 49.884  | 40.983   |
| Total     |           | 2042239 | 86769  | 100.000 | 100.000  |

Description : AD-H; 320 nm; Flow = 0.7 mL/min; i-PrOH/Hexane = 5/95

# <Chromatogram>

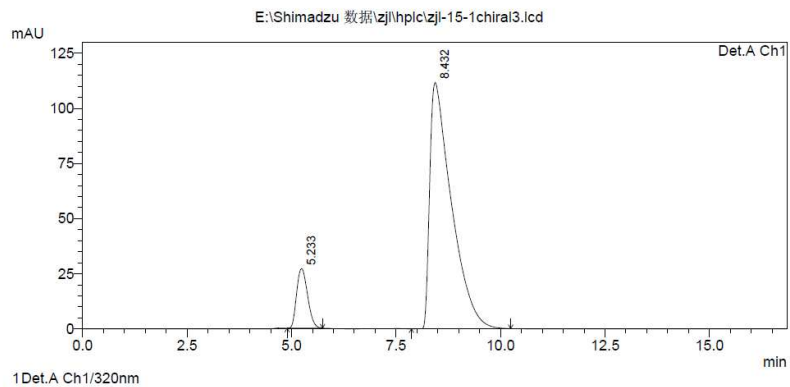

| PeakTable |           |         |        |         |          |
|-----------|-----------|---------|--------|---------|----------|
| Peak#     | Ret. Time | Area    | Height | Area %  | Height % |
| 1         | 5.233     | 488845  | 26950  | 10.818  | 19.444   |
| 2         | 8.432     | 4029913 | 111650 | 89.182  | 80.556   |
| Total     |           | 4518759 | 138600 | 100.000 | 100.000  |
